# AUTHOR CORRECTIONS

For the article by Wong *et al.* in the June 2002 issue of ANESTHESIOLOGY (2002;96:1395-1400), the authors acknowledge errors on the y axis of their figure 1 and figure 3. The correct figures are as follows:

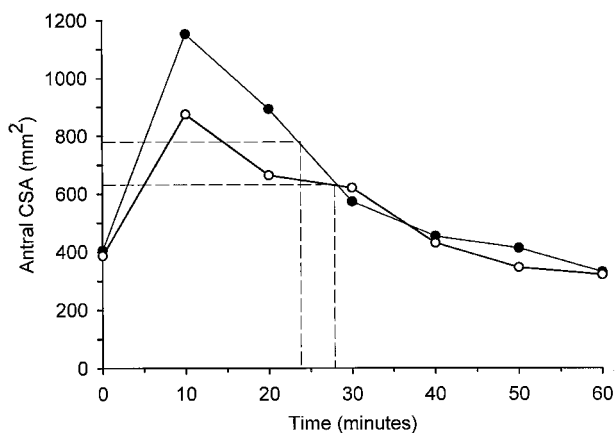

Fig. 1.

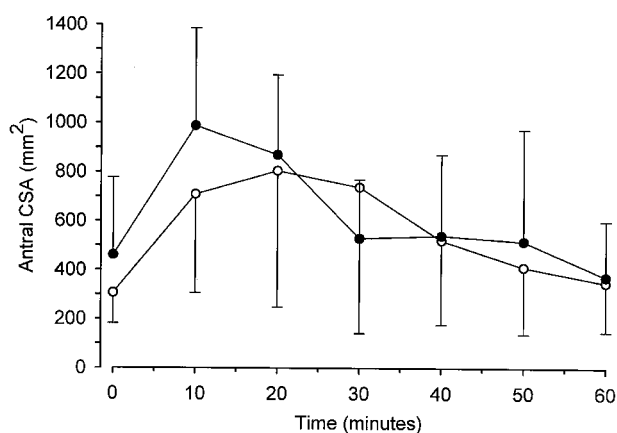

Fig. 3.

For the article by Tataru *et al.* in the August 2002 issue of ANESTHESIOLOGY (2002;97:518-20), the authors acknowledge that figure 1 should have appeared as follows:

Fig. 1. Logistic plot of the effect of myristate on the halothane anesthesia. The concentrations of myristate are shown. The Y-axis contains information on the two unknown values ( $ED_{50}$  and  $n$ ). Obtained best fit values are displayed in table 1.

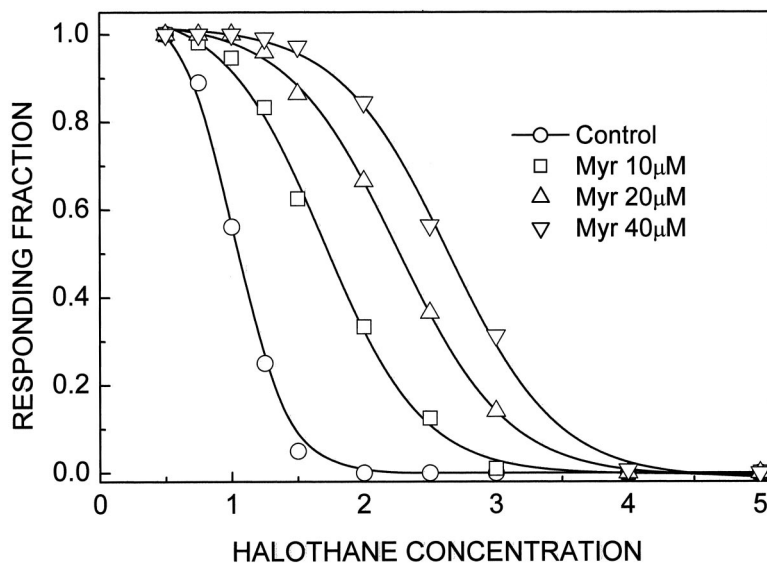

## AUTHOR CORRECTIONS

For the article by Riley *et al.* in the September 2002 issue of ANESTHESIOLOGY (2002;97:574-7), the authors acknowledge that the manufacturer of the Sprotte needle was incorrectly identified as Pencan, B. Braun (Melsungen, Germany). The needle used in the study was from Pajunk GmbH (Geisengen, Germany). The authors do not believe that this error alters their conclusions or the validity of their findings.

For the article by Auroy *et al.* in the November 2002 issue of ANESTHESIOLOGY (2002;97:1274-80), the authors acknowledge that the author names should be listed as follows:

Yves Auroy, M.D., Dan Benhamou, M.D., Laurent Bargues, M.D., Claude Ecoffey, M.D., Bruno Falissard, M.D., Ph.D., Frédéric J. Mercier, M.D., Ph.D., Hervé Bouaziz, M.D., Ph.D., Kamran Samii
